# Supplementary material for: The PASTA domains of Bacillus subtilis PBP2B strengthen the interaction of PBP2B with DivIB
Source: PubMed Central journal article supplement — Microbiology (Reading). 2020 Aug 4;166(9):826–36. doi: 10.1099/mic.0.000957 (PMC7654742; doi:10.1099/mic.0.000957), 2020-08-04
Supplement: mic-166-826-s001.pdf [file mic-166-826-s001.pdf]

## Supplemental material for

### The PASTA domains of *Bacillus subtilis* PBP2B strengthen the interaction of PBP2B with DivIB

Danae Morales Angeles, Alicia Macia-Valero, Laura C. Bohorquez, Dirk-Jan Scheffers

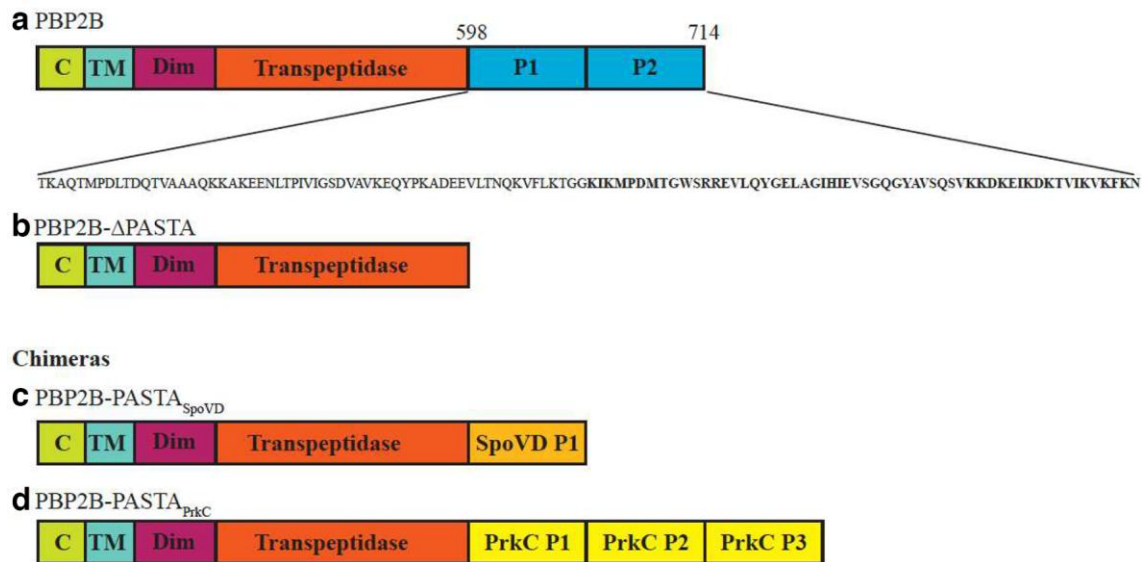

**Figure S1. PBP2B variants used in this study.** a) PBP2B b) PBP2B-ΔPASTA c) PBP2B-PASTA<sub>SpoVD</sub> d) PBP2B-PASTA<sub>PrkC</sub>. C: cytoplasmic domain, TM: transmembrane, Dim: dimerization domain, P: PASTA domain.

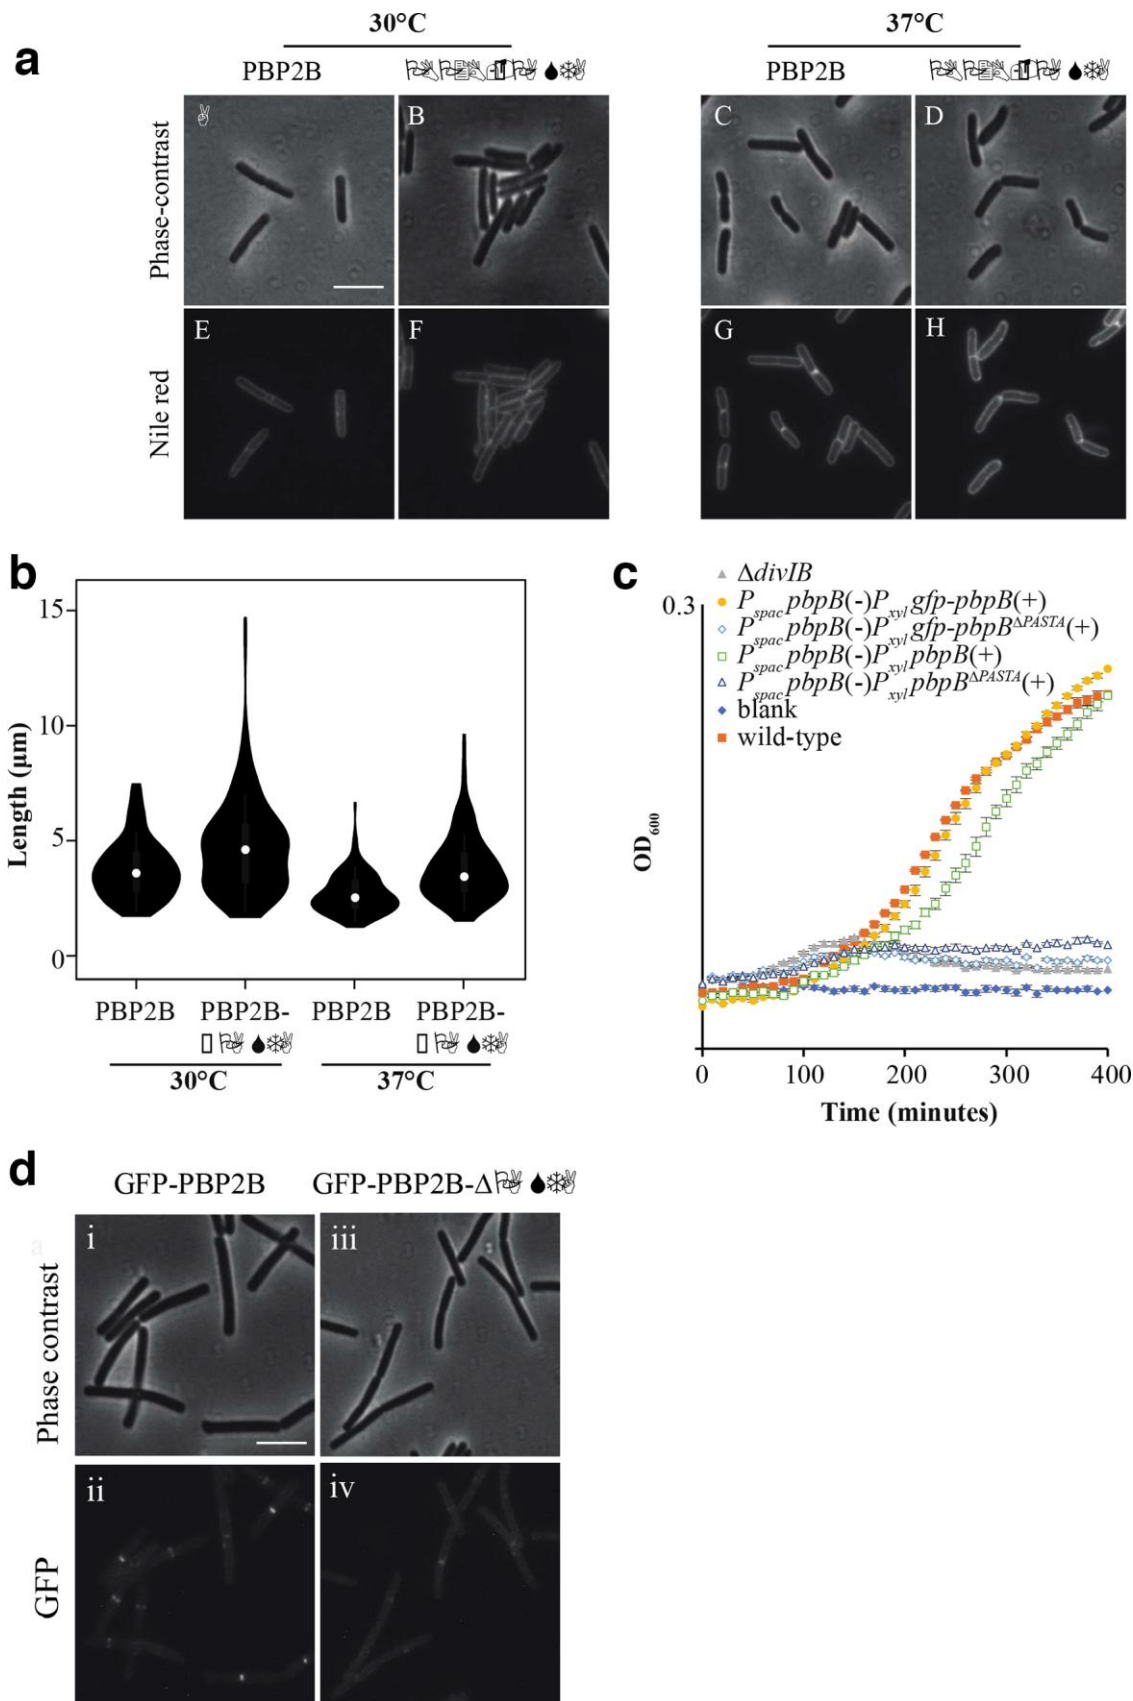

**Figure S2. Strains grown in SM medium and localization of GFP-fusions.** a) Cells were grown at 30 or 37°C until exponential phase. Membranes were stained using Nile red. Representative results from three independent experiments are shown. Scale bar: 5  $\mu\text{m}$ . b)

Length of PBP2B strains grown on SM medium. Cells were grown in SM medium at 30 or 37°C. As *B. subtilis* forms chains, cells were labelled with Nile red in order to determine the boundaries of single cells. Length of cells was obtained by automated image analysis. The values obtained ( $n = 200$  per strain) are shown as box plots. White circles show the medians ( $P_{xyl} pbpB$  30°C = 3.59  $\mu\text{m}$ ,  $P_{xyl} pbpB^{\Delta PASTA}$  30°C = 4.61  $\mu\text{m}$ ,  $P_{xyl} pbpB$  37°C = 2.53  $\mu\text{m}$ ,  $P_{xyl} pbpB^{\Delta PASTA}$  37°C = 3.45  $\mu\text{m}$ ); box limits indicate the 25th and 75th percentiles as determined by R software; whiskers extend 1.5 times the interquartile range from the 25th and 75th percentiles; polygons represent density estimates of data and extend to extreme values. c) Growth curves in SM medium at 48°C,  $\text{OD}_{600}$  was measured every 10 min. Genotypes are shown and presence (+) or absence (-) of inducer is indicated. (◆) SM medium, blank, (■) wild type (strain 168), (▲)  $\Delta divIB$  (strain  $\Delta divIB$ ), (●)  $P_{spac} pbpB(-) P_{xyl} gfp-pbpB(+)$  (strain 4132), (◇)  $P_{spac} pbpB(-) P_{xyl} gfp-pbpB^{\Delta PASTA}(+)$  (strain 4133), (□)  $P_{spac} pbpB(-) P_{xyl} pbpB(+)$  (strain 4137) (△)  $P_{spac} pbpB(-) P_{xyl} pbpB^{\Delta PASTA}(+)$  (strain 4138). Representative results from three independent experiments are shown. All experiments were performed in triplicates. The resulting average and standard error are shown for each time point. d) Phase-contrast (i, iii) and fluorescence (ii, iv) microscopy of the strains producing GFP-PBP2B (strain 4132; i, ii) and GFP-PBP2B- $\Delta PASTA$  (strain 4133; iii, iv) strains. Cultures were grown in CH-medium at 30°C until exponential phase. Representative results from three independent experiments are shown. Scale bar: 5  $\mu\text{m}$ .

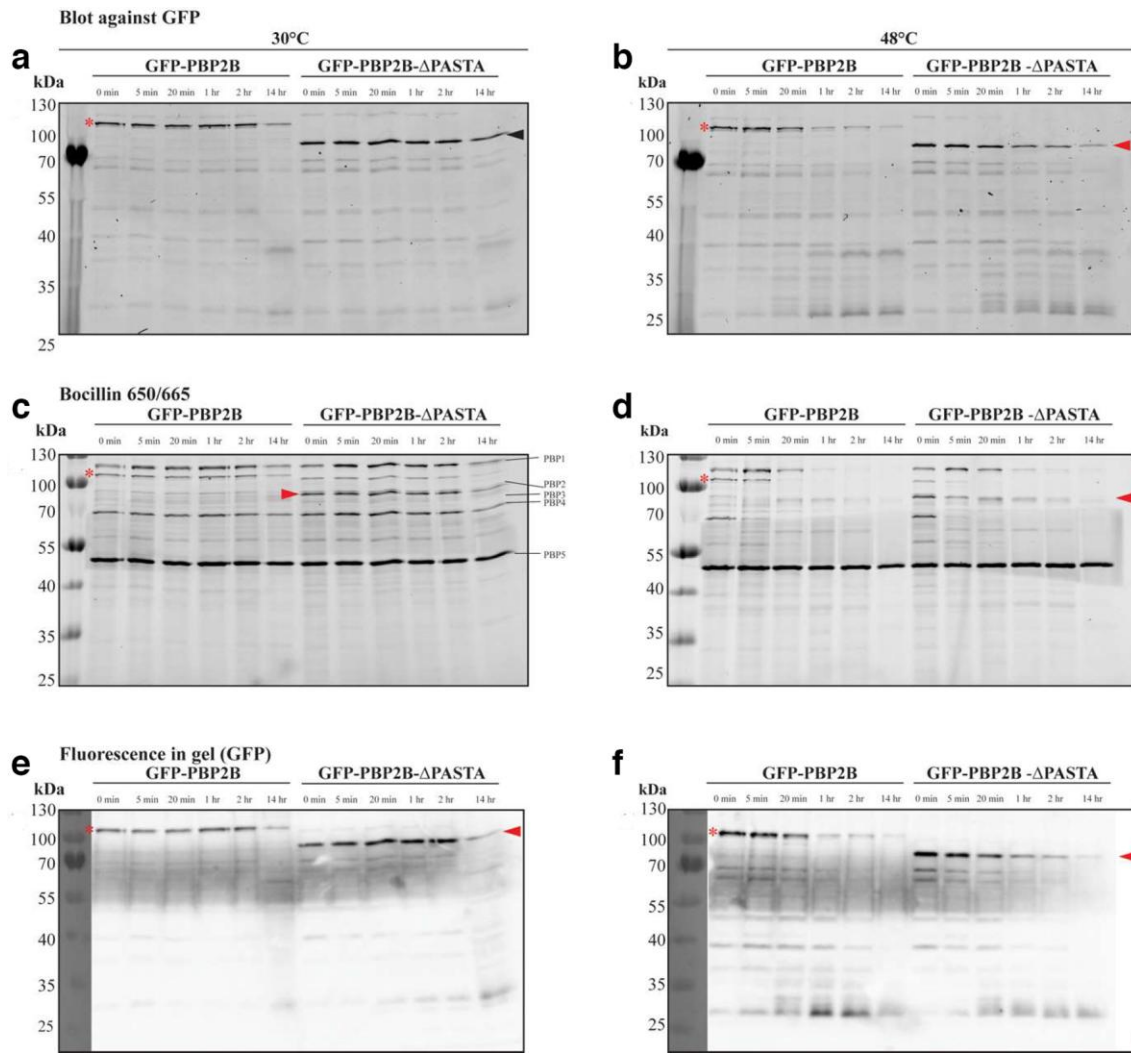

**Figure S3. PBP2B and PBP2B- $\Delta$ PASTA stability.** Membrane proteins of GFP-PBP2B and GFP-PBP2B- $\Delta$ PASTA strains were isolated from cells incubated at 30°C. Membranes were incubated at 30°C (a, c, e) or 48°C (b, d, f) at different time points, and then incubated with Bocillin 650/665. GFP was followed by fluorescence in gel (a, b) and western blot using anti-GFP antibodies (e, f). Effects on folding were followed by the ability of Bocillin 650/665 to bind to PBPs (c, d). The star indicates the position of GFP-PBP2B and the triangle the position of GFP-PBP2B- $\Delta$ PASTA. Representative results from three independent experiments are shown.

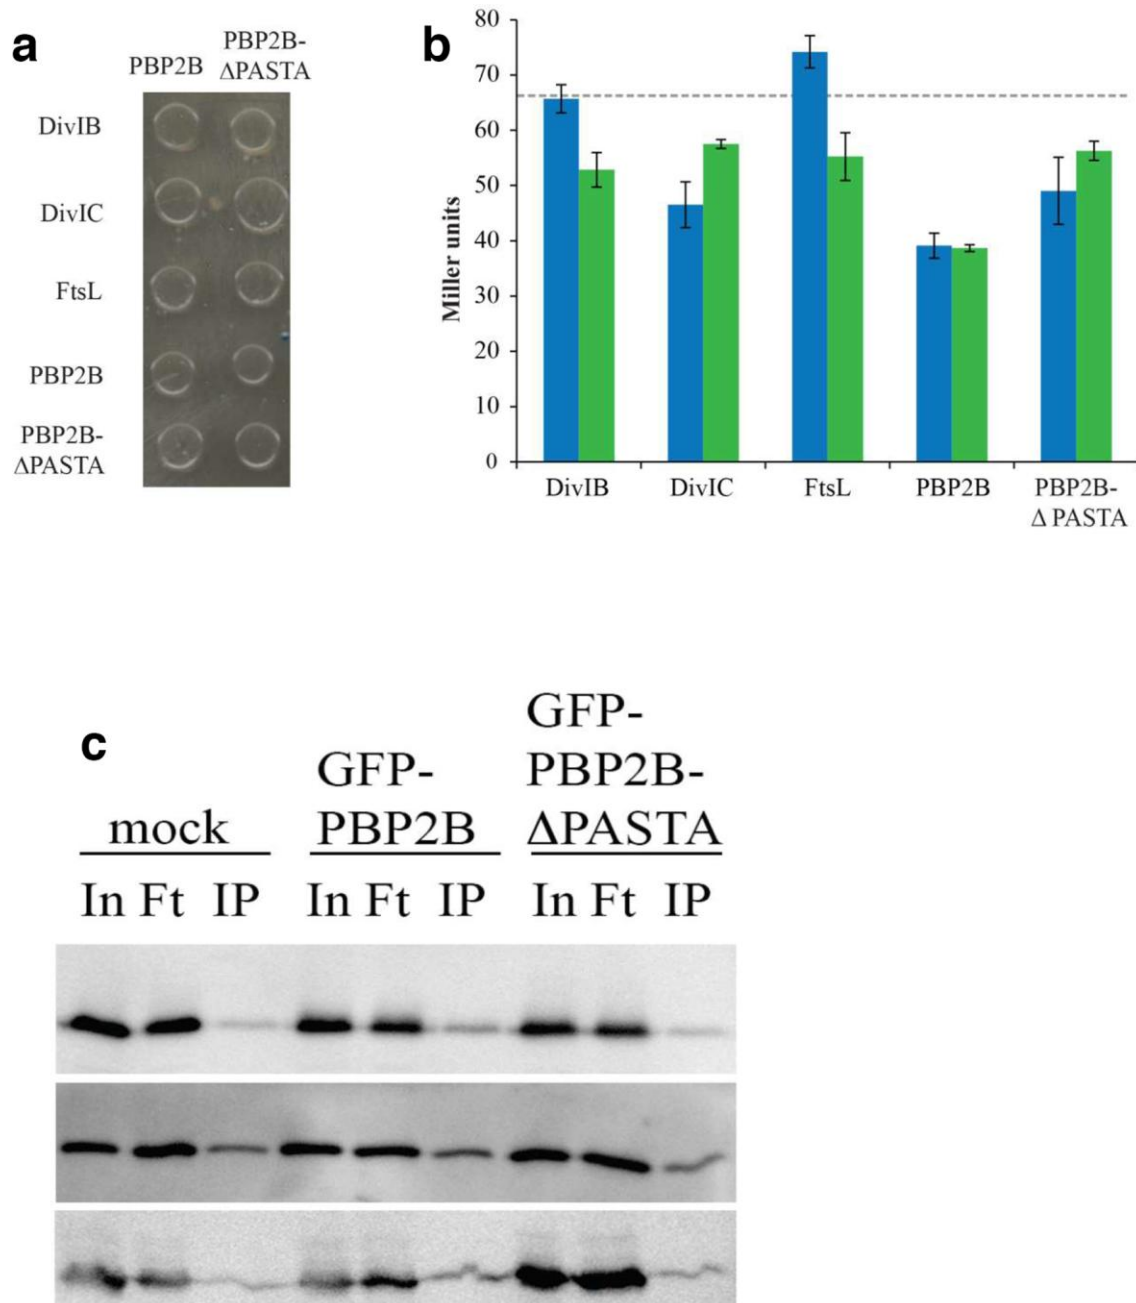

**Figure S4. Bacterial two-hybrid and co-Immunoprecipitation controls.** a) Bacterial two hybrid interaction assay on plates containing X-Gal. PBP2B, PBP2B $\Delta$ -PASTA, DivIB, DivIC and FtsL were cloned into plasmids pKT25 and pUT18C and co-transformed into *E. coli* BTH101. Co-transformants were grown on LB plates containing X-Gal and incubated at 30°C for 36 hrs. Blue colonies are considered indicative of protein-protein interaction. PBP2B and PBP2B- $\Delta$ PASTA were used as bait in pUT18C, while prey proteins in pKT25. Representative results from three independent experiments are shown. b) Bacterial two hybrid  $\beta$ -galactosidase assay. Interaction between the fusion of PBP2B and PBP2B- $\Delta$ PASTA cloned into pUT18C in combination with the fusion of late division protein cloned into pKT25 Positive control showed an activity of 63278 Miller units and the negative control 66 (shown as dotted line). Representative results from three independent experiments are shown. All experiments were performed in triplicates. The resulting average and standard error are shown for each interaction. c) Western blots of three separate biological replicate co-Immunoprecipitation experiments. Solubilised membranes from strains producing DivIB-

FLAG (mock) or DivIB-FLAG and GFP-PBP2B (GFP-PBP2B) or DivIB-FLAG and GFP-PBP2B- $\Delta$ PASTA (GFP-PBP2B- $\Delta$ PASTA) were immunoprecipitated using GFP-Trap agarose beads. Input (In), flow-through (Ft) and eluted (IP) material was analysed by SDS-PAGE/Western Blot and the blots were developed using anti-FLAG antibodies. These blots were used to determine the ratio of immunoprecipitated over unbound material in Fig. 4D.

**Table S1. List of primers used in this study**

| Primer         | Sequence                                                                 | Source    |
|----------------|--------------------------------------------------------------------------|-----------|
| PrkC PASTA fw  | <b>ACCAACTGAAAAATCTGACTCAGATAAGGAAGAAATG</b><br>CCTAAG GATGTCAAATACCT    | This work |
| PrkC PASTA rv  | <b>ATCGATACCGTCGACCCTCGAGTTAGAGAGAGAATGTC</b><br>ACTTCA ACT              | This work |
| SpoVD PASTA fw | <b>ACCAACTGAAAAATCTGACTCAGATAAGGAAGAAAGAC</b><br>ACAAAA ACAATAGAAGTTCCGA | This work |
| SpoVD PASTA rv | <b>ATCGATACCGTCGACCCTCGAGTTATTCAGTCAAATAC</b><br>ACGCGT ATC              | This work |
| b2h_divIBfw    | GGAGGATCTAGAGATGAACCCGGGTCAAGACC                                         | This work |
| b2h_divIBrev   | GGATTCGGTACCCCTCAATTTTCATCTTCC                                           | This work |
| b2h_divICfw    | GGAGGATCTAGAGATGAATTTTCCAGGGAACGA                                        | This work |
| b2h_divICrev   | GGATTCGGTACCGGCTACTTGCTCTTCTTCTCC                                        | This work |
| b2h_ftsLfw     | GGAGGATCTAGAGATGAGCAATTTAGCTTACCAACC                                     | This work |
| b2h_ftsLrev    | GGATTCGGTACCTCATTCTGTATGTTTTTCAC                                         | This work |
| b2h_pbpBfw     | GGAGGATCTAGAGATGATTCAAATGCCAAAAAAG                                       | This work |
| b2h_pbpBrev    | GGATTCGGTACCTTAATCAGGATTTTAACTTAACCTTG                                   | This work |
| b2h_pbpBdPrev  | GGATTCGGTACCTTATTCTTCTTATCTGAGTCAG                                       | This work |

\* Bold letters correspond to the original plasmid sequence

**Table S2. Average of length ( $\mu$ m) of wild-type, PBP2B and PBP2B- $\Delta$ PASTA strains under different conditions.** Cells were grown in CH or SM medium at 30 or 37°C. As *B. subtilis* forms chains, cells were labelled with Nile red in order to determine the boundaries of single cells. Length of cells was obtained by automated image analysis. The values obtained ( $n = 200$  per strain) were averaged. The standard deviation is presented between brackets.

|                                                  | CH medium          |                    | SM medium          |                    |
|--------------------------------------------------|--------------------|--------------------|--------------------|--------------------|
|                                                  | 30°C               | 37°C               | 30°C               | 37°C               |
| wildtype                                         | 2.96 ( $\pm$ 0.70) | 3.14 ( $\pm$ 0.84) | 1.85 ( $\pm$ 0.44) | 1.78 ( $\pm$ 0.48) |
| <i>P<sub>xyl</sub> pbpB</i>                      | 3.34 ( $\pm$ 0.81) | 3.12 ( $\pm$ 0.73) | 3.78 ( $\pm$ 1.28) | 2.68 ( $\pm$ 0.83) |
| <i>P<sub>xyl</sub> pbpB<sup>APASTA</sup></i>     | 4.85 ( $\pm$ 1.39) | 5.20 ( $\pm$ 1.81) | 4.71 ( $\pm$ 1.97) | 3.79 ( $\pm$ 1.40) |
| <i>P<sub>xyl</sub> pbpB<sup>PASTASpoVD</sup></i> | 3.57 ( $\pm$ 0.94) | ND                 | ND                 | ND                 |
| <i>P<sub>xyl</sub> pbpB<sup>PASTAPrkC</sup></i>  | 4.55 ( $\pm$ 1.69) | ND                 | ND                 | ND                 |

ND- not determined

**Table S3. Mann-Whitney U test.** Strain lengths were compared to determine if there was statistical difference (n = 200, p < 0.05)

| Strains                                                                     | Conditions     | <i>U</i> | <i>p</i> < 0.05 two-tailed |
|-----------------------------------------------------------------------------|----------------|----------|----------------------------|
| $P_{xyl} \text{ } pbpB$ vs $P_{xyl} \text{ } pbpB^{\Delta PASTA}$           | CH-medium 30°C | 6706.5   | 0                          |
| $P_{xyl} \text{ } pbpB$ vs $P_{xyl} \text{ } pbpB^{\Delta PASTA}$           | CH-medium 37°C | 4676.5   | 0                          |
| $P_{xyl} \text{ } pbpB$ vs $P_{xyl} \text{ } pbpB^{\Delta PASTA}$           | SM-medium 30°C | 9321.5   | 0                          |
| $P_{xyl} \text{ } pbpB$ vs $P_{xyl} \text{ } pbpB^{\Delta PASTA}$           | SM-medium 37°C | 9572.5   | 0                          |
| $pbpB^{\Delta PASTA}$ vs $P_{xyl} \text{ } pbpB^{PASTASpoVD}$               | CH-medium 30°C | 8832     | 0                          |
| $pbpB^{\Delta PASTA}$ vs $P_{xyl} \text{ } pbpB^{PASTAPrkC}$                | CH-medium 30°C | 16933.5  | 0.008                      |
| $P_{xyl} \text{ } pbpB^{PASTASpoVD}$ vs $P_{xyl} \text{ } pbpB^{PASTAPrkC}$ | CH-medium 30°C | 12156    | 0                          |
